# Supplementary material for: Review of the Lithuanian Alcohol Control Legislation in 1990–2020
Source: Int J Environ Res Public Health. 2020 May 15;17(10):3454. doi: 10.3390/ijerph17103454 (PMC7277450; doi:10.3390/ijerph17103454)
Supplement: Supplementary file 1 [file ijerph-17-03454-s001.xlsx]

## Sheet: Supplement material Table 1
	Supplement material. Table S1: Changes in alcohol excise tax in Lithuania 1990-2020
	Date of implementation	Ethyl alcohol	Beer	Wine, actual alcoholic strength by volume not exceeding 13 vol. / fresh grape wine and other fermented beverages*	Intermediate products**	Reference	URL
	1994-04-28	0.25 LTL (0.07 EUR) per 1% of actual alcoholic strength by volume	10% value tax***	0.15 LTL (0.04 EUR) per 1% of actual alcoholic strength by volume	0.20 LTL (0.06 EUR) per 1% of actual alcoholic strength by volume (mead brandy, vermouth, strong wines); 20% value tax*** (for sparkling wines category only)	[48]	https://e-seimas.lrs.lt/portal/legalAct/lt/TAD/TAIS.12774?jfwid=-iznpthwxf
	1995-07-01	↓20%, 0.20 LTL (0.06 EUR) for the 1% of actual alcoholic strength by volume. 40% value tax*** introduced.	↑50%, 15% for value tax***; but not less then 0.40 LTL (0,12 EUR) per litre	20% value tax*** introduced; but not less then 0.10 LTL (0,03 EUR) for 1% of actual alcoholic strength by volume	20 and 40 % value tax*** for sparkling wines and mead brandy/vermouth/strong wines respectively; but not less then 0.10 LTL (strong wines up till 18% vol./vermouth), 0.15 LTL (sparkling wines) and 0.20 LTL (strong wines) for 1% of actual alcoholic strength by volume (0.03, 0.04 and 0.06 EUR)	[49]	https://www.e-tar.lt/portal/lt/legalAct/TAR.CC79FCCE5977
	1995-11-01	↑25%. 0.25 LTL (0.07 EUR) for the 1% of actual alcoholic strength by volume. Value tax*** unchanged	-	↑25%. 25% value tax***; but not less then 0.12 LTL (0,04 EUR) for 1% of actual alcoholic strength by volume (↑20%)	↑25%. 25 and 40 % value tax***; but not less then 0.15 (↑50%), 0.20 (↑33%) and 0.25 LTL (↑25%) for 1% of actual alcoholic strength by volume respectively to the above (0.04, 0.06 and 0.07 EUR).	[50]	https://e-seimas.lrs.lt/portal/legalAct/lt/TAD/TAIS.21396?jfwid=-iznpthwxf
	1996-06-10	↑20%. 0.30 LTL (0.09 EUR) for the 1% of actual alcoholic strength by volume. Value tax*** unchanged	-	-	-	[51]	https://e-seimas.lrs.lt/portal/legalAct/lt/TAD/TAIS.27638?jfwid=-iznpthwxf
	1996-07-18	-	-	-	Changes for mead brandy category only. 20% value tax***; but not less then 0.10 LTL (0.03 EUR) for 1% of actual alcoholic strength by volume. Other categories unchanged.	[52]	https://e-seimas.lrs.lt/portal/legalAct/lt/TAD/TAIS.29526?jfwid=-iznpthwxf
	1997-04-15	↑43%. 0.43 LTL (0.13 EUR) for 1% of actual alcoholic strength by volume. Value tax*** removed	0.40 LTL (0,12 EUR) per litre. Value tax*** removed	0.12 LTL (0.04 EUR) for 1% of actual alcoholic strength by volume. Value tax*** removed	Only taxing by volume strenght: 0.12 - 0.35 LTL for 1% of actual alcoholic strength by volume (0.03-0.10 EUR). Value tax*** removed.	[53]	https://e-seimas.lrs.lt/portal/legalAct/lt/TAD/TAIS.37671?jfwid=-iznpthwxf
	1998-04-10	↑25.6%. 0.54 LTL (0.16 EUR) for 1% of actual alcoholic strength by volume.	-	Wine from fresh grapes 0.16 LTL (0.05 EUR), other 0.12 LTL (0.04 EUR) for 1% of actual alcoholic strength by volume.	↑0-20%. 0.12 - 0.42 LTL for 1% of actual alcoholic strength by volume (0.03 - 0.12 EUR) .	[54]	https://e-seimas.lrs.lt/portal/legalAct/lt/TAD/TAIS.53073?jfwid=-iznpthwxf (accessed on 3
	1999-01-01	-	-	-	-	[55]	https://e-seimas.lrs.lt/portal/legalAct/lt/TAD/TAIS.69741
	1999-10-13	↓44%. 0.30 LTL (0.09 EUR) for 1% of actual alcoholic strength by volume.	-	-	↓0-40%. 0.12 - 0.38 LTL for 1% of actual alcoholic strength by volume (0.03 - 0.11 EUR). The significant decline (by 40%) in excise for the sparkling wines.	[56]	https://e-seimas.lrs.lt/portal/legalAct/lt/TAD/TAIS.87813
	2001-05-30 and 06-01	3200 LTL/hl (927 EUR) of absolute ethyl alcohol.	7 LTL (2,03 EUR) for 1% of actual alcoholic strength by volume;	Wine from fresh grapes 150 LTL/hl (43.44 EUR); fermented beverages (<8.5% vol.) 40 LTL/hl (11.59 EUR)	Mead brandy: 0.12 for 1% of actual alcoholic strength by volume. Intermediate products: 150 (<15% vol.) and 230 LTL/hl (>15% vol.). Other types of fermeted beverages 250 (<15% vol.) - 370 (>15% vol.) LTL/hl (72-107 EUR)	[57]	https://e-seimas.lrs.lt/portal/legalAct/lt/TAD/TAIS.135264
	2002-07-01	-	7 LTL/hl (2,03 EUR) of product for 1% of actual alcoholic strength by volume. Tax reduction by 50% for small breweries introduced.	-	Mead brandy: 1200 LTL/hl (348 EUR) of absolute ethyl alcohol. Intermediate products: 150 (<15% vol.) and 230 LTL/hl (>15% vol.) (43-67 EUR). Other types of fermeted beverages 250 (<15% vol.) - 370 (>15% vol.) LTL/hl (72-107 EUR)	[58]	https://e-seimas.lrs.lt/portal/legalAct/lt/TAD/TAIS.154511?jfwid=-fxdp7gkt
	2004-01-01	-	-	-	↓39-40% for other fermented beverages categories which equalized the tarrifs with intermediate products: 150 (<15% vol.) and 230 LTL/hl (>15% vol.) (43-67 EUR)	[57]	https://e-seimas.lrs.lt/portal/legalAct/lt/TAD/TAIS.135264
	2004-05-01	-	-	-	Intermediate products (one category formed): 150 (<15% vol.) and 230 LTL/hl (>15% vol.). (43-67 EUR)	[60]	https://e-seimas.lrs.lt/portal/legalAct/lt/TAD/TAIS.229451
	2008-01-01	↑20%. 3840 LTL/hl (1112 EUR) of absolute ethyl alcohol.	↑10% to 7.7 LTL/hl (2.23 EUR) for 1% of actual alcoholic strength by volume. Tax reduction by 50% for small breweries.	↑25%. Wine from fresh grapes 180 LTL/hl (52.13 EUR); fermented beverages (<8.5% vol.) 48 LTL/hl (13.90 EUR)	↑20%. Intermediate products: 180 (<15% vol.) and 276 (>15% vol.) LTL/hl. (52-80 EUR)	[61]	https://e-seimas.lrs.lt/portal/legalAct/lt/TAD/TAIS.310864
	2009-01-01	↑15%. 4416 LTL/hl (1278.96 EUR) of absolute ethyl alcohol.	↑10.4% to 8.5 LTL/hl (2.46 EUR) for 1% of actual alcoholic strength by volume. Tax reduction for small breweries repealed.	↑10%. Wine from fresh grapes 198 LTL/hl (57.34 EUR); fermented beverages (<8.5% vol.) 53 LTL/hl (15.35 EUR)	↑10%. Intermediate products: 198 (<15% vol.) and 304 (>15% vol.) LTL/hl (57-88 EUR)	[62]	https://e-seimas.lrs.lt/portal/legalAct/lt/TAD/TAIS.334544
	2012-01-01	-	-	↑9.4%, fermented beverages (<8.5% vol.) 58 LTL/hl (16.79 EUR). Excise for wine from fresh grapes - unchanged;	↑9%. Intermediate products: 216 LTL/hl (<15% vol.) and unchanged for >15% vol. (62-88 EUR)	[63]	https://e-seimas.lrs.lt/portal/legalAct/lt/TAD/TAIS.410970
	2014-04-01	↑1%. 4460 LTL/hl (1292 EUR) of absolute ethyl alcohol.	↑10% to 9.35 LTL/hl (2.71 EUR) for 1% of actual alcoholic strength by volume.	↑13.6-46.5%. Wine from fresh grapes 225 LTL/hl (65 EUR); fermented beverages (<8.5% vol.) 85 LTL/hl (24.61 EUR)	↑30-32%. Intermediate products: 281 (<15% vol.) and 400 (>15% vol.) LTL/hl. (81-116 EUR)	[64]	https://e-seimas.lrs.lt/portal/legalAct/lt/TAD/TAIS.453230
	2016-03-01	↑4.8%. 1353.69 EUR/hl of absolute ethyl alcohol.	↑24% to 3.36 EUR/hl for 1% of actual alcoholic strength by volume.	↑19.5-25.8%. Wine from fresh grapes 77.89 EUR per 1 hectolitre; fermented beverages (<8.5% vol.) 30.96 EUR/hl	↑18-19%. Intermediate products: 96.65 (<15% vol.) and 136.37 (>15% vol.) EUR/hl.	[65]	https://e-seimas.lrs.lt/portal/legalAct/lt/TAD/2474d6a29e7411e591078486468c1c39
	2017-03-01	↑23%. 1665.04 EUR/hl of absolute ethyl alcohol.	↑111.6% to 7.11 EUR/hl for 1% of actual alcoholic strength by volume.	↑111.4%. Wine from fresh grapes 164.67 EUR per 1 hectolitre; fermented beverages (<8.5% vol.) 65.46 EUR/hl	↑91-94%. Intermediate products: 185.82 (<15% vol.) and 264.52 (>15% vol.) EUR/hl	[66]	https://e-seimas.lrs.lt/portal/legalAct/lt/TAD/70c38f72c90611e682539852a4b72dd4
	2019-03-01	↑10%. 1832 EUR/hl of absolute ethyl alcohol.	-	-	-	[67]	https://e-seimas.lrs.lt/portal/legalAct/lt/TAD/7a894702fe1711e89b04a534c5aaf5ce
	2020-03-01	↑10.5%. 2025 EUR/hl of absolute ethyl alcohol.	-	-	-	[68]	https://e-seimas.lrs.lt/portal/legalAct/lt/TAD/3605c02017fe11ea8faecfea528bacc6
	*A category reflects Wine, actual alcoholic strength by volume not exceeding 13 vol. Later it was redefined to wine of fresh grapes (volume strenght up to 15 or in some cases up to 18%) and other fermented beverages of alcoholic strength by volume which are not exceeding 8,5% since 2001 and merged into one category since 2004
	**The category includes intermediate products and all other types of alcoholic beverages like mead brandy, vermouth, strong wines etc. The beverages included into the category has been redefined and sole category of intermediate producsts was formed when Lithuania was preparing to join the EU in 2004.
	***Value tax (apmokestinamosios vertės procentais) - a taxable value percents which adds a proportional tax to the value of the specific product excluding the excise tax and value added tax
	Note: text in green or red (and arrows) indicates an increase or a decline respectively in excise tax comparing with the previous change in excise duty, the % increase is estimated where possible.
